# Supplementary material for: Confocal Laser Endomicroscopy Assessment of Pituitary Tumor Microstructure: A Feasibility Study
Source: MDPI journal article supplement (doi:10.3390/jcm9103146), 2020-09-29
Supplement: s1 [file s1]

# Supplement 1. Confocal laser endomicroscopy assessment of pituitary tumor microstructure— Histopathology questionnaire

**BIOPSY NUMBER** \_\_\_\_\_

All samples are from a mass lesion in the sellar region.

**1. Please select statements, that apply to this slide:**

- ☐ - The whole folder is non-informative
- ☐ - Mainly normal tissue
- ☐ - Mainly normal tissue, but has some abnormal/suspicious features
- ☐ - Mainly abnormal tissue, unable to characterize
- ☐ - Pituitary adenoma
- ☐ - Other abnormal (list if possible \_\_\_\_\_)

**2. Select histologic features that you identified and used to select the statement in the 1st question**

- ☐ - Small organized lobules of pituitary epithelial cells
- ☐ - Uniform nuclei without atypia
- ☐ - Normal tissue architecture, not otherwise specified
- ☐ - Abnormal tissue architecture/growth pattern
- ☐ - Atypical cells
- ☐ - Mitoses
- ☐ - Increased cellularity
- ☐ - Increased vascularity

**List any other features:** \_\_\_\_\_

**3. This biopsy is diagnostic of cellular tumor (select one)**

- 1 non-diagnostic
- 2 less likely diagnostic
- 3 likely diagnostic
- 4 more likely diagnostic
- 5 very diagnostic

**4. This biopsy is diagnostic of pituitary adenoma (select one)**

- 1 non-diagnostic
- 2 less likely diagnostic
- 3 likely diagnostic
- 4 more likely diagnostic
- 5 very diagnostic

**5. This biopsy is diagnostic of normal pituitary gland (select one)**

- 1 non-diagnostic
- 2 less likely diagnostic
- 3 likely diagnostic
- 4 more likely diagnostic
- 5 very diagnostic

**6. Rate the quality of the best informative image on a scale from 1 to 5:**

- 1----2----3----4----5
- 1 poor quality
- 3 moderate

5 excellent quality

**Video 1.** Confocal laser endomicroscopy video of pituitary adenoma showing sheets of uniform nonlobulated cells with prominent nuclei. Used with permission from Barrow Neurological Institute, Phoenix, Arizona.

**Video 2.** Confocal laser endomicroscopy video loop of pituitary adenoma showing perivascular sheets of the cells. Used with permission from Barrow Neurological Institute, Phoenix, Arizona.
